# Supplementary material for: Use of Radon and CO2 for the Identification and Analysis of Short-Term Fluctuations in the Ventilation of the Polychrome Room Inside the Altamira Cave
Source: MDPI journal article supplement (doi:10.3390/ijerph19063662), 2022-03-19
Supplement: s1 [file s1]

**Table S1.** Time record, start and end of the  $n$  selected degassing-recharging events considering CO<sub>2</sub> as a reference.

| <b>n</b> | <b>Start of degassing</b> | <b>End of discharge/start of recharging</b> | <b>End of recharging</b> |
|----------|---------------------------|---------------------------------------------|--------------------------|
| 1        | 10-Apr-2015 20 h          | 15-Apr-2015 19 h                            | 20-Apr-2015 06 h         |
| 2        | 26-Apr-2015 00 h          | 26-Apr-2015 08 h                            | 28-Apr-2015 04 h         |
| 3        | 30-Apr-2015 16 h          | 04-May-2015 04 h                            | 08-May-2015 01 h         |
| 4        | 15-May-2015 23 h          | 18-May-2015 07 h                            | 20-May-2015 22 h         |
| 5        | 04-Oct-2015 20 h          | 06-Oct-2015 14 h                            | 10-Oct-2015 13 h         |
| 6        | 10-Oct-2015 15 h          | 12-Oct-2015 21 h                            | 17-Oct-2015 02 h         |
| 7        | 17-Oct-2015 22 h          | 19-Oct-2015 20 h                            | 23-Oct-2015 20 h         |
| 8        | 20-May-2016 07 h          | 21-May-2016 23 h                            | 23-May-2016 20 h         |
| 9        | 23-May-2016 20 h          | 28-May-2016 09 h                            | 01-Jun-2016 22 h         |
| 10       | 18-Jun-2016 22 h          | 23-Jun-2016 20 h                            | 27-Jun-2016 14 h         |
| 11       | 15-Oct-2016 09 h          | 19-Oct-2016 05 h                            | 22-Oct-2016 22 h         |
| 12       | 22-Oct-2016 22 h          | 27-Oct-2016 16 h                            | 29-Oct-2016 00 h         |
| 13       | 25-Mar-2017 08 h          | 31-Mar-2017 05 h                            | 05-Apr-2017 17 h         |
| 14       | 05-Apr-2017 17 h          | 09-Apr-2017 21 h                            | 11-Apr-2017 15 h         |
| 15       | 20-Apr-2017 20 h          | 24-Apr-2017 02 h                            | 28-Apr-2017 09 h         |
| 16       | 14-May-2017 00 h          | 17-May-2017 03 h                            | 20-May-2017 01 h         |
| 17       | 12-Oct-2017 07 h          | 16-Oct-2017 20 h                            | 19-Oct-2017 20 h         |
| 18       | 25-Oct-2017 05 h          | 28-Oct-2017 16 h                            | 01-Nov-2017 13 h         |
| 19       | 01-Nov-2017 13 h          | 04-Nov-2017 02 h                            | 11-Nov-2017 01 h         |
| 20       | 11-Apr-2018 18 h          | 22-Apr-2018 10 h                            | 03-May-2018 16 h         |
| 21       | 03-May-2018 16 h          | 08-May-2018 07 h                            | 10-May-2018 17 h         |
| 22       | 12-Apr-2019 06 h          | 15-Apr-2019 08 h                            | 19-Apr-2019 11 h         |
| 23       | 22-Apr-2019 18 h          | 23-Apr-2019 10 h                            | 24-Apr-2019 10 h         |
| 24       | 06-May-2019 19 h          | 09-May-2019 01 h                            | 10-May-2019 08 h         |
| 25       | 14-May-2019 04 h          | 16-May-2019 10 h                            | 19-May-2019 22 h         |
| 26       | 22-May-2019 10 h          | 23-May-2019 22 h                            | 25-May-2019 10 h         |
| 27       | 29-May-2019 09 h          | 02-Jun-2019 21 h                            | 06-Jun-2019 11 h         |
| 28       | 14-Jun-2019 15 h          | 20-Jun-2019 22 h                            | 22-Jun-2019 19 h         |
| 29       | 11-Sep-2019 13 h          | 19-Sep-2019 12 h                            | 11-Oct-2019 14 h         |
| 30       | 23-Oct-2019 21 h          | 02-Nov-2019 07 h                            | 10-Nov-2019 13 h         |
| 31       | 04-Apr-2020 04 h          | 05-Apr-2020 18 h                            | 07-Apr-2020 14 h         |
| 32       | 09-Apr-2020 12 h          | 11-Apr-2020 01 h                            | 14-Apr-2020 16 h         |
| 33       | 14-Apr-2020 16 h          | 18-Apr-2020 09 h                            | 22-Apr-2020 04 h         |
| 34       | 15-May-2020 23 h          | 23-May-2020 03 h                            | 25-May-2020 08 h         |
| 35       | 25-May-2020 08 h          | 30-May-2020 01 h                            | 05-Jun-2020 03 h         |
| 36       | 30-Agu-2020 11 h          | 05-Sep-2020 19 h                            | 09-Sep-2020 18 h         |
| 37       | 05-Oct-2020 13 h          | 09-Oct-2020 14 h                            | 17-Oct-2020 17 h         |

**Table S2.** Maximum correlation coefficient between the temperature gradient and the concentration of gases in degassing, recharging events or in complete periods. The average value and the standard deviation (*SD*) are reported.

| <i>n</i>       | <b>Degassing</b>      |                        | <b>Recharging</b>     |                        | <b>Complete</b>       |                        |
|----------------|-----------------------|------------------------|-----------------------|------------------------|-----------------------|------------------------|
|                | $r(\Delta T- C_{Rn})$ | $r(\Delta T- C_{CO2})$ | $r(\Delta T- C_{Rn})$ | $r(\Delta T- C_{CO2})$ | $r(\Delta T- C_{Rn})$ | $r(\Delta T- C_{CO2})$ |
| 1              | -0.79                 | -0.87                  | -0.65                 | -0.73                  | -0.66                 | -0.73                  |
| 2              | -0.81                 | -0.91                  | -0.52                 | -0.58                  | -0.51                 | -0.70                  |
| 3              | -0.49                 | -0.52                  | -0.60                 | -0.60                  | -0.51                 | -0.54                  |
| 4              | -0.44                 | -0.60                  | -0.35                 | -0.44                  | -0.41                 | -0.51                  |
| 5              | -0.63                 | -0.66                  | -0.36                 | -0.15                  | -0.32                 | -0.32                  |
| 6              | -0.45                 | -0.53                  | -0.68                 | -0.72                  | -0.66                 | -0.68                  |
| 7              | -0.44                 | -0.34                  |                       |                        | -0.44                 | -0.34                  |
| 8              |                       |                        |                       |                        |                       |                        |
| 9              |                       |                        |                       |                        |                       |                        |
| 10             | -0.51                 | -0.56                  | -0.45                 | -0.67                  | -0.37                 | -0.38                  |
| 11             | -0.39                 | -0.47                  | -0.68                 | -0.68                  | -0.64                 | -0.62                  |
| 12             | -0.20                 | -0.19                  | -0.66                 | -0.69                  | -0.14                 | -0.15                  |
| 13             | -0.61                 | -0.54                  | -0.53                 | -0.53                  | -0.51                 | -0.51                  |
| 14             | -0.54                 | -0.58                  | -0.28                 | -0.34                  | -0.50                 | -0.50                  |
| 15             | -0.30                 | -0.12                  | -0.67                 | -0.64                  | -0.40                 | -0.20                  |
| 16             | -0.38                 | -0.44                  | -0.74                 | -0.80                  | -0.53                 | -0.53                  |
| 17             | -0.81                 | -0.87                  | -0.79                 | -0.81                  | -0.54                 | -0.62                  |
| 18             | -0.26                 | -0.45                  | -0.49                 | -0.57                  | -0.43                 | -0.55                  |
| 19             | -0.40                 | -0.47                  | -0.44                 | -0.58                  | -0.49                 | -0.63                  |
| 20             | -0.73                 | -0.74                  | -0.73                 | -0.79                  | -0.72                 | -0.74                  |
| 21             | -0.59                 | -0.61                  | -0.50                 | -0.56                  | -0.53                 | -0.58                  |
| 22             | -0.71                 | -0.73                  | -0.21                 | -0.11                  | -0.36                 | -0.38                  |
| 23             | -0.79                 | -0.92                  | -0.78                 | -0.74                  | -0.66                 | -0.72                  |
| 24             | -0.50                 | -0.52                  | -0.31                 | -0.29                  | -0.44                 | -0.40                  |
| 25             | -0.31                 | -0.51                  | -0.61                 | -0.56                  | -0.40                 | -0.51                  |
| 26             | -0.40                 | -0.38                  | -0.55                 | -0.62                  | -0.41                 | -0.37                  |
| 27             | -0.58                 | -0.59                  | -0.45                 | -0.50                  | -0.40                 | -0.30                  |
| 28             | -0.51                 | -0.46                  | -0.18                 | -0.38                  | -0.44                 | -0.38                  |
| 29             | -0.53                 | -0.55                  | -0.42                 | -0.44                  | -0.34                 | -0.45                  |
| 30             | -0.58                 | -0.56                  | -0.77                 | -0.78                  | -0.69                 | -0.60                  |
| 31             | -0.69                 | -0.78                  | -0.83                 | -0.82                  | -0.72                 | -0.78                  |
| 32             | -0.47                 | -0.37                  | -0.73                 | -0.72                  | -0.63                 | -0.50                  |
| 33             | -0.48                 | -0.31                  | -0.14                 | -0.25                  | -0.19                 | -0.11                  |
| 34             | -0.50                 | -0.49                  | -0.42                 | -0.41                  | -0.46                 | -0.42                  |
| 35             | -0.54                 | -0.62                  | -0.48                 | -0.64                  | -0.48                 | -0.44                  |
| 36             | -0.56                 | -0.64                  | -0.24                 | -0.28                  | -0.42                 | -0.47                  |
| 37             | -0.47                 | -0.52                  | -0.69                 | -0.73                  | -0.63                 | -0.66                  |
| <i>Average</i> | -0.53                 | -0.55                  | -0.53                 | -0.56                  | -0.49                 | -0.49                  |
| <i>SD</i>      | 0.15                  | 0.18                   | 0.19                  | 0.19                   | 0.14                  | 0.17                   |

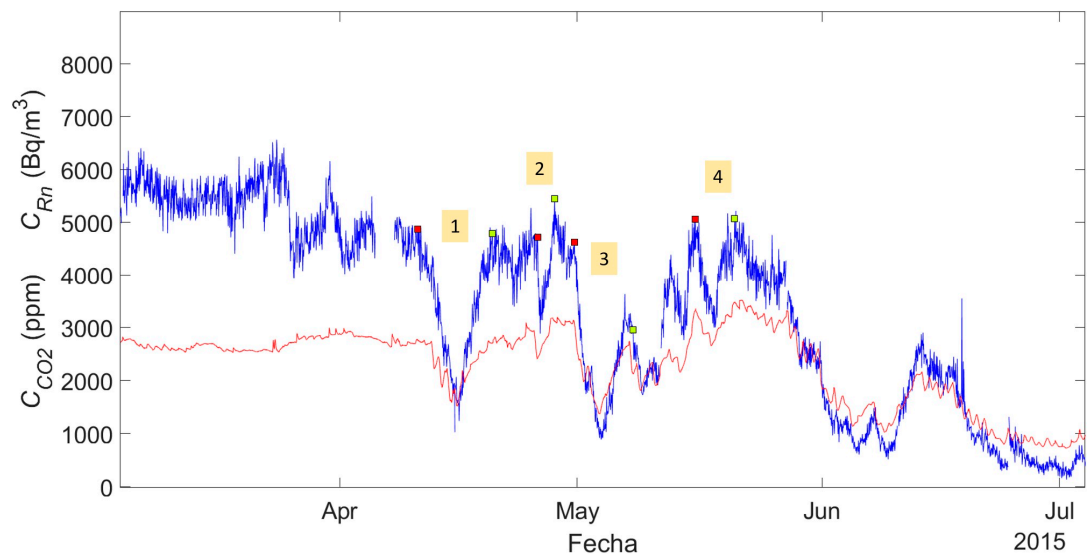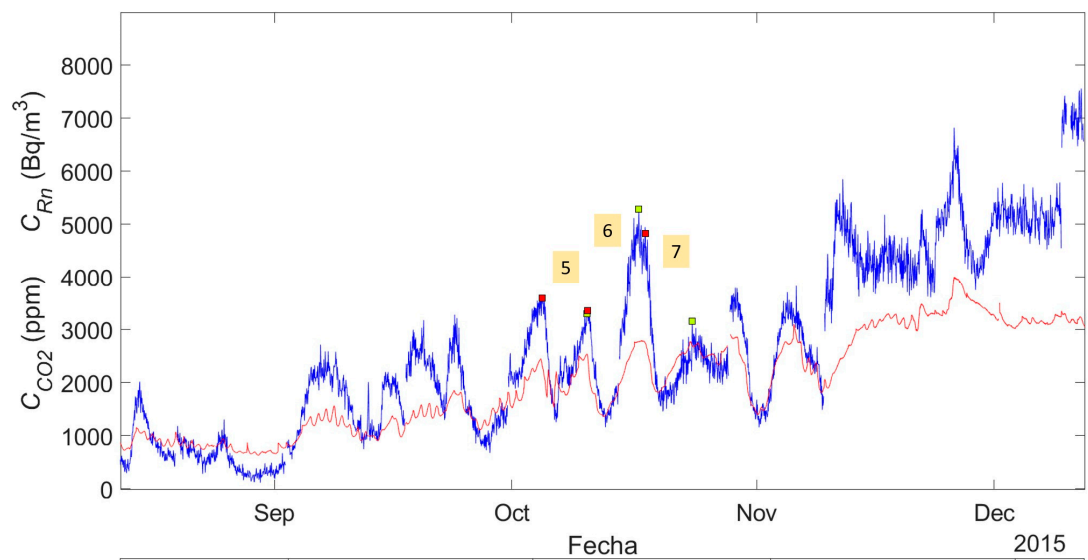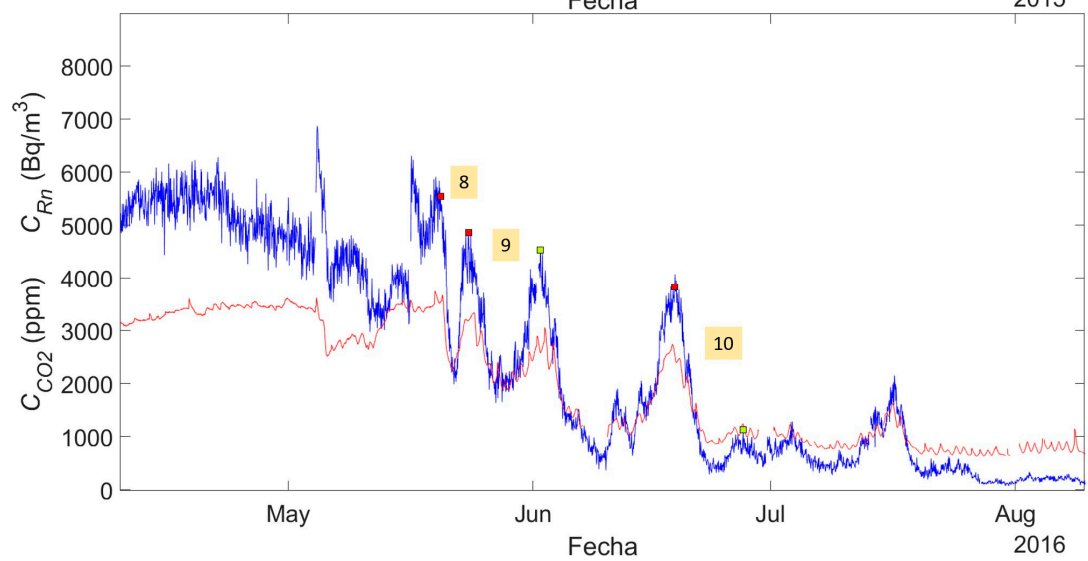

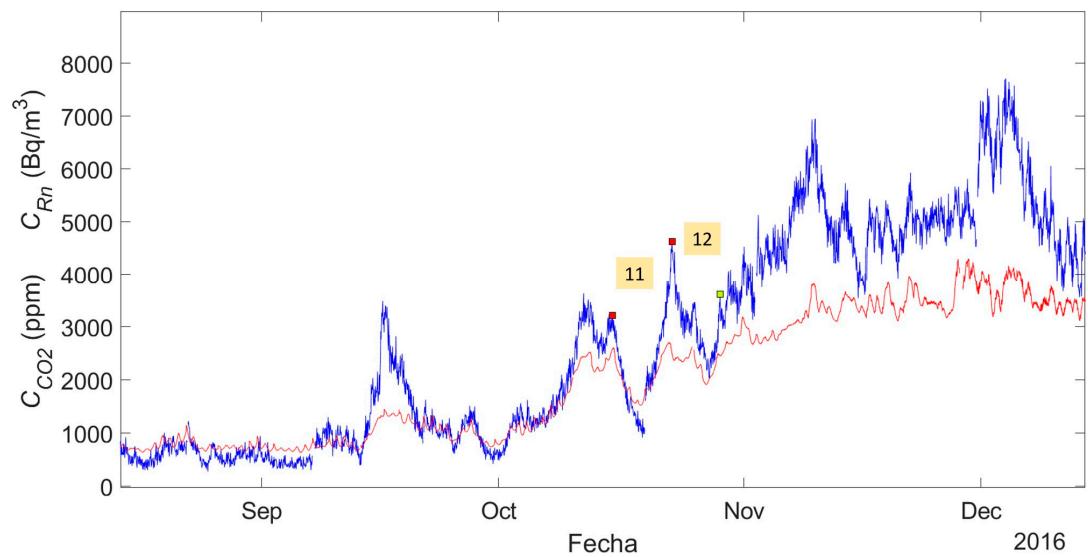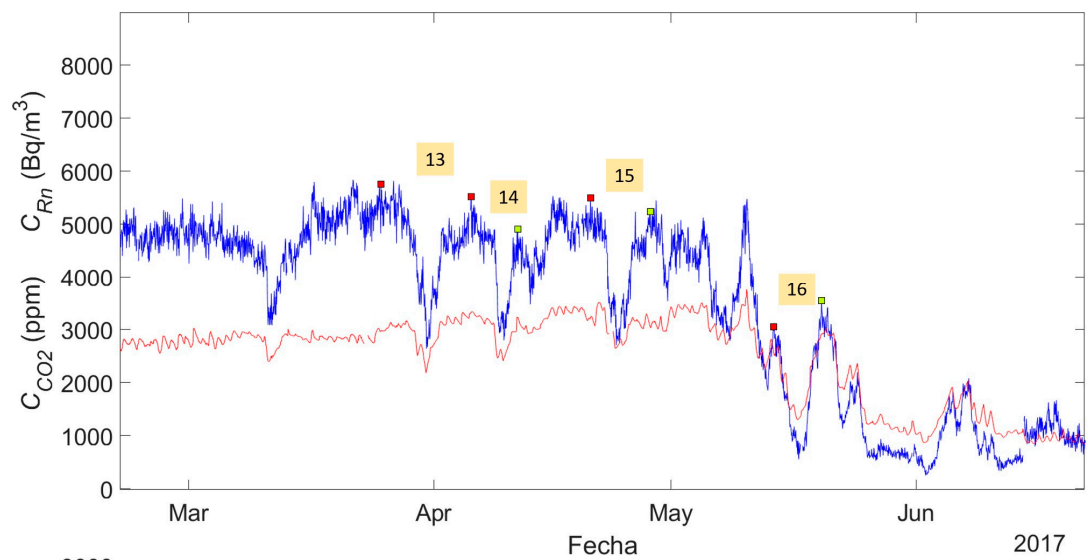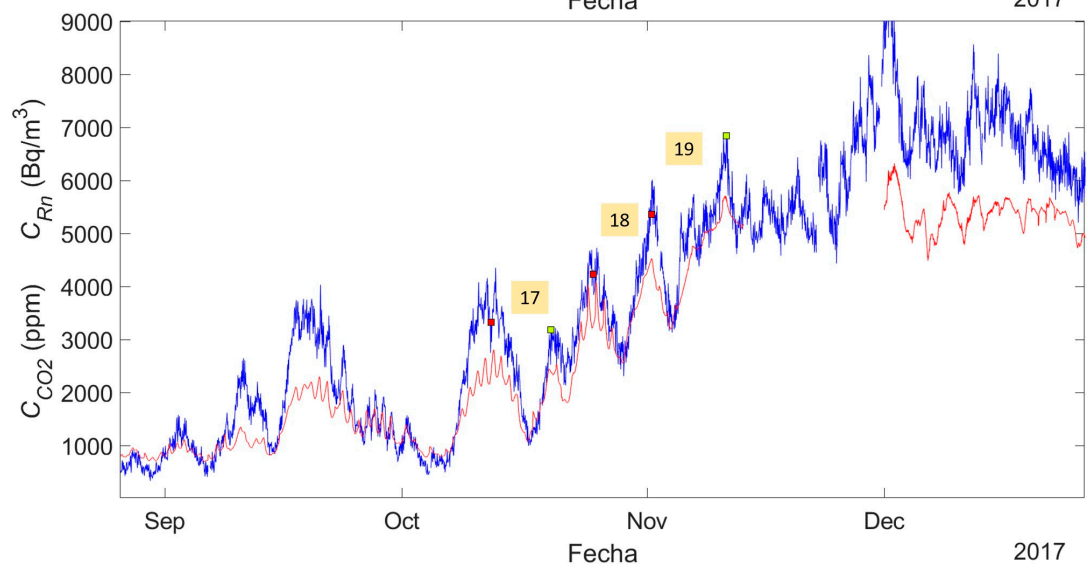

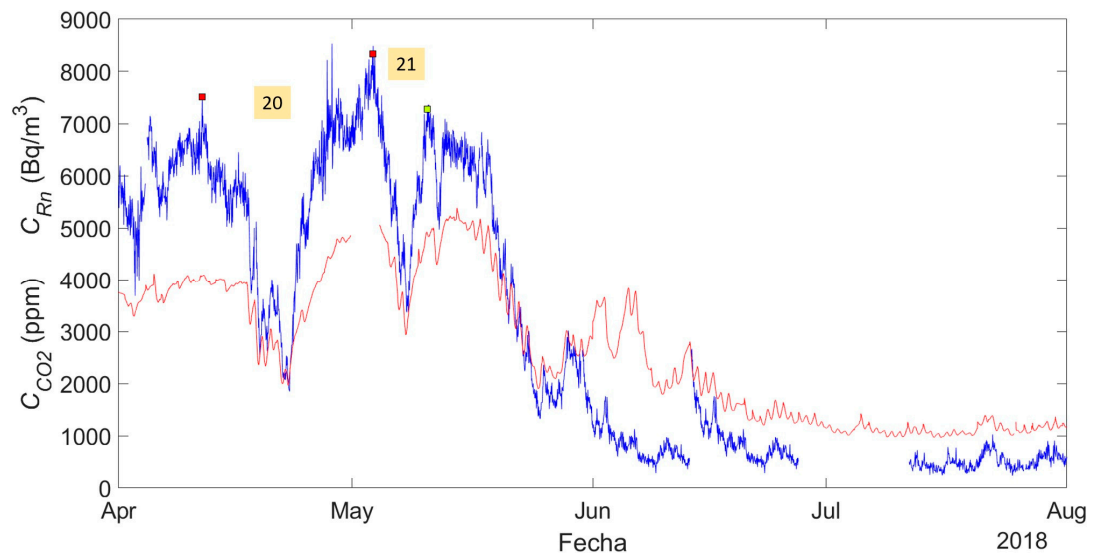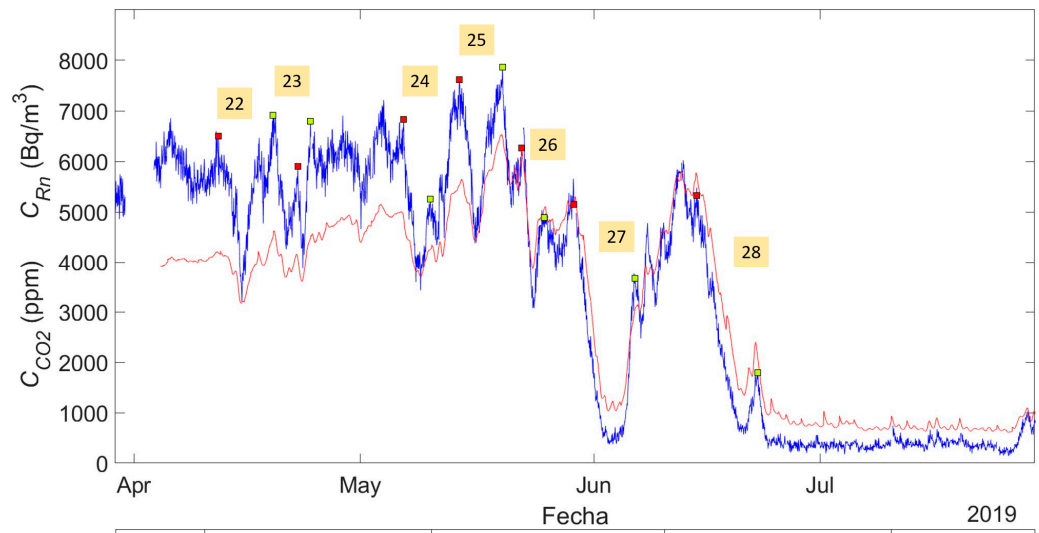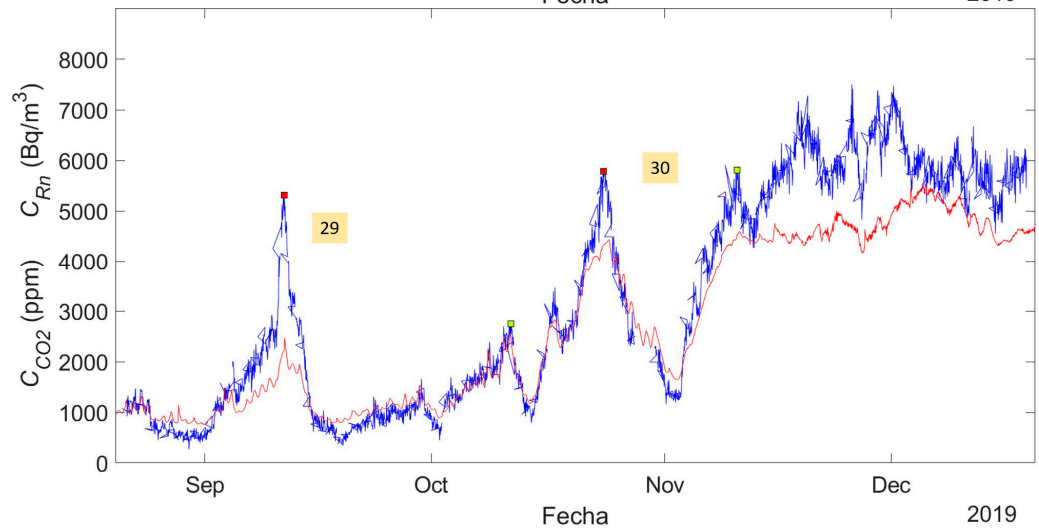

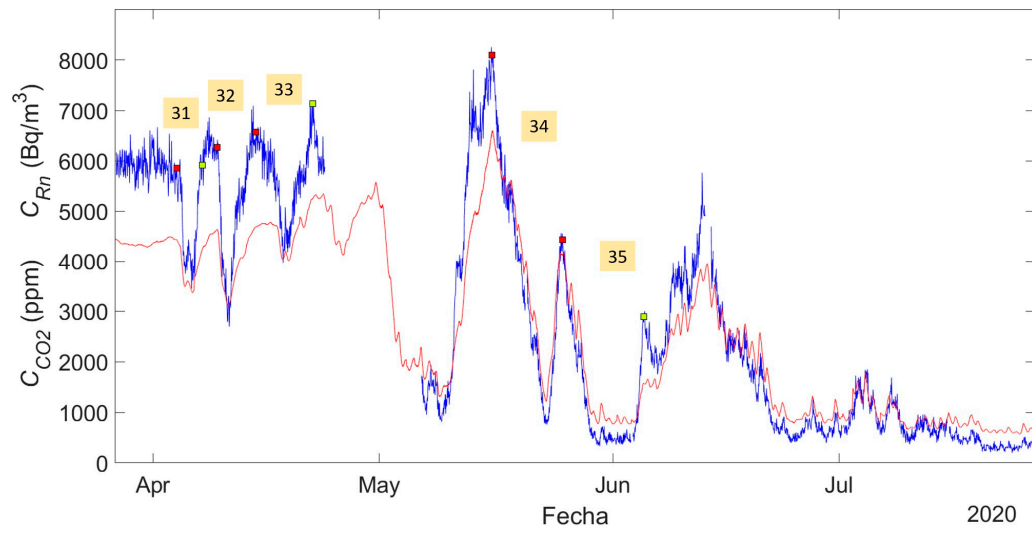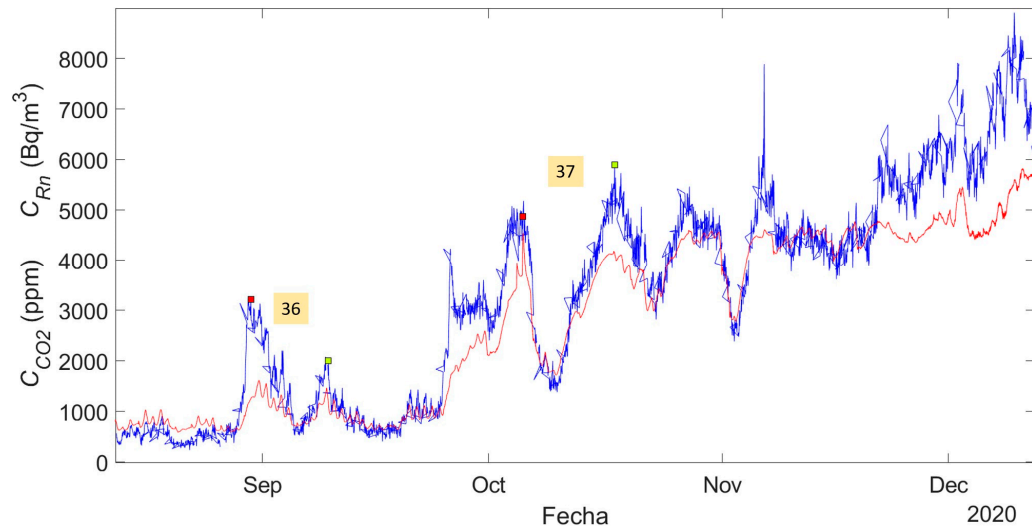

**Figure S1.** Graphs of every degasification and recharge events.
